# Supplementary material
Source: PubMed Central journal article supplement (PMC5047097)
Supplement: supp_pp.16.00837_PP2016-00837R1_Supplemental_Material.pdf [file supp_pp.16.00837_PP2016-00837R1_Supplemental_Material.pdf]

## Supplementary Materials

| <b>Table 1.</b> [CO <sub>2</sub> ] and mycorrhizal effects on fungal growth, plant physiology, and plant growth in <i>T. ceratophorum</i> . |              |                       |                   |                   |                   |                   |                         |
|---------------------------------------------------------------------------------------------------------------------------------------------|--------------|-----------------------|-------------------|-------------------|-------------------|-------------------|-------------------------|
| <b>Trait</b>                                                                                                                                | <b>Model</b> | <b>CO<sub>2</sub></b> | <b>C×C</b>        | <b>Myc</b>        | <b>C×M</b>        | <b>C×C×M</b>      | <b>ΔAIC<sub>c</sub></b> |
| <b>Overall growth</b>                                                                                                                       |              |                       |                   |                   |                   |                   |                         |
| Total biomass (g)                                                                                                                           | linear       | 51.07****             | -                 | 0.08              | 0.48              | -                 | 10.47                   |
|                                                                                                                                             | quadratic    | 59.24****             | 4.30*             | 2.4               | 0.54              | 3.81*             | 0.00                    |
| Leaf biomass (g)                                                                                                                            | linear       | 43.14****             | -                 | 0.00              | 0.65              | -                 | 38.30                   |
|                                                                                                                                             | quadratic    | 46.71****             | 3.87*             | 1.63              | 0.49              | 3.05 <sup>a</sup> | 0.00                    |
| Total root biomass (g)                                                                                                                      | linear       | 48.05****             | -                 | 0.28              | 0.25              | -                 | 37.90                   |
|                                                                                                                                             | quadratic    | 55.11****             | 3.51 <sup>a</sup> | 2.66              | 0.43              | 3.56 <sup>a</sup> | 0.00                    |
| Fine root biomass (g)                                                                                                                       | linear       | 35.07****             | -                 | 0.02              | 0.67              | -                 | 16.80                   |
|                                                                                                                                             | quadratic    | 35.12****             | 1.25              | 1.08              | 0.98              | 1.87              | 0.00                    |
| <b>Root growth</b>                                                                                                                          |              |                       |                   |                   |                   |                   |                         |
| Total root length (m)                                                                                                                       | linear       | 36.72****             | -                 | 0.42              | 4.59*             | -                 | 0.52                    |
|                                                                                                                                             | quadratic    | 39.62****             | 5.44*             | 0.19              | 2.70 <sup>a</sup> | 0.02              | 0.00                    |
| SRL (m g <sup>-1</sup> )                                                                                                                    | linear       | 29.97****             | -                 | 0.73              | 1.9               | -                 | 0.00                    |
|                                                                                                                                             | quadratic    | 48.79****             | 9.13**            | 0.02              | 3.38 <sup>a</sup> | 1.39              | 225.93                  |
| <b>Leaf growth</b>                                                                                                                          |              |                       |                   |                   |                   |                   |                         |
| Total leaf area (cm <sup>2</sup> )                                                                                                          | linear       | 20.55****             | -                 | 0.19              | 7.64**            | -                 | 0.00                    |
|                                                                                                                                             | quadratic    | 17.67****             | 1.07              | 0.86              | 2.96 <sup>a</sup> | 0.41              | 3.51                    |
| SLA (cm <sup>2</sup> g <sup>-1</sup> )                                                                                                      | linear       | 46.69****             | -                 | 3.15 <sup>a</sup> | 0.09              | -                 | 9.80                    |
|                                                                                                                                             | quadratic    | 59.37****             | 14.10***          | 0.05              | 0.01              | 0.62              | 0.00                    |
| Leaf production (#)                                                                                                                         | linear       | 24.56****             | -                 | 0.21              | 4.72*             | -                 | 0.00                    |
|                                                                                                                                             | quadratic    | 20.56****             | 0.44              | 0.004             | 2.48              | 0.13              | 4.37                    |
| Growth rate (Δleaf #/day)                                                                                                                   | linear       | 14.32***              | -                 | 0.09              | 4.45*             | -                 | 0.00                    |
|                                                                                                                                             | quadratic    | 16.29****             | 2.52              | 0.08              | 1.98              | 0.27              | 2.17                    |
| Growth rate (Δleaf length/day)                                                                                                              | linear       | 37.73****             | -                 | 0.06              | 3.91*             | -                 | 1.40                    |
|                                                                                                                                             | quadratic    | 41.28****             | 5.47*             | 0.50              | 1.05              | 1                 | 0.00                    |
| <b>Leaf stoichiometry</b>                                                                                                                   |              |                       |                   |                   |                   |                   |                         |
| Leaf N content (mg cm <sup>-2</sup> )                                                                                                       | linear       | 3.55 <sup>a</sup>     | -                 | 1.73              | 0.23              | -                 | 15.64                   |
|                                                                                                                                             | quadratic    | 11.63***              | 18.65****         | 0.24              | 0.06              | 2.61              | 0.00                    |
| Leaf P content (mg cm <sup>-2</sup> )                                                                                                       | linear       | 0.24                  | -                 | 1.57              | 0.80              | -                 | 0.00                    |
|                                                                                                                                             | quadratic    | 0.38                  | 0.85              | 0.57              | 0.87              | 0.01              | 4.32                    |
| N:P (mg mg <sup>-1</sup> )                                                                                                                  | linear       | 1.09                  | -                 | 2.94 <sup>a</sup> | 0.05              | -                 | 0.00                    |
|                                                                                                                                             | quadratic    | 1.54                  | 2.51              | 0.6               | 0.05              | 0.08              | 2.60                    |
| C:N (mg mg <sup>-1</sup> )                                                                                                                  | linear       | 19.34****             | -                 | 0.48              | 0.22              | -                 | 0.00                    |
|                                                                                                                                             | quadratic    | 4.57*                 | 1.05              | 1.18              | 0.15              | 0.68              | 4.58                    |
| <b>Leaf gas exchange</b>                                                                                                                    |              |                       |                   |                   |                   |                   |                         |
| Photosynthetic rate (A, μmol m <sup>-2</sup> s <sup>-1</sup> )                                                                              | linear       | 23.00****             | -                 | 0.02              | 1.04              | -                 | 2.06                    |
|                                                                                                                                             | quadratic    | 24.86****             | 3.26 <sup>a</sup> | 1.99              | 3.35 <sup>a</sup> | 2.77 <sup>a</sup> | 0.00                    |
| Stomatal conductance (g <sub>s</sub> , mmol m <sup>-2</sup> s <sup>-1</sup> )                                                               | linear       | 37.14****             | -                 | 0.90              | 1.60              | -                 | 0.00                    |
|                                                                                                                                             | quadratic    | 35.56****             | 2.76 <sup>a</sup> | 0.99              | 2.40              | 0.42              | 2.04                    |
| Water-use efficiency (A/E)                                                                                                                  | linear       | 45.07****             | -                 | 0.05              | 0.00              | -                 | 0.00                    |
|                                                                                                                                             | quadratic    | 24.78****             | 0.65              | 0.12              | 0.1               | 0.12              | 4.09                    |
| <b>Fungal growth</b>                                                                                                                        |              |                       |                   |                   |                   |                   |                         |
| Mycorrhizal colonization rate (%)                                                                                                           | linear       | 0.99                  | -                 | 113.33****        | 0.61              | -                 | 17.45                   |
|                                                                                                                                             | quadratic    | 0.70                  | 0.03              | 18.70****         | 0.05              | 0.29              | 0.00                    |
| Mycorrhizal root length (m)                                                                                                                 | linear       | 3.61 <sup>a</sup>     | -                 | 101.46****        | 1.26              | -                 | 0.00                    |
|                                                                                                                                             | quadratic    | 3.04 <sup>a</sup>     | 0.31              | 18.04****         | 0.63              | 0.09              | 142.34                  |

\*Asterisks indicate the level of significance (\* $P \geq 0.05$ , \*\* $P \geq 0.01$ , \*\*\* $P \geq 0.001$ , \*\*\*\* $P \geq 0.0001$ )

<sup>a</sup>Response shows a marginal trend (0.1 >  $P$  > 0.05)

**Table 2.** [CO<sub>2</sub>] and mycorrhizal effects on fungal growth, plant physiology, and plant growth in *T. officinale*.

| Trait                                                                         | Model     | CO <sub>2</sub>   | C×C               | Myc               | C×M               | C×C×M             | ΔAIC <sub>c</sub> |
|-------------------------------------------------------------------------------|-----------|-------------------|-------------------|-------------------|-------------------|-------------------|-------------------|
| <b>Plant biomass</b>                                                          |           |                   |                   |                   |                   |                   |                   |
| Total biomass (g)                                                             | linear    | 32.74****         | -                 | 0.12              | 2.61              | -                 | 4.60              |
|                                                                               | quadratic | 37.80****         | 5.91*             | 1.84              | 1.61              | 3.42 <sup>a</sup> | 0.00              |
| Leaf biomass (g)                                                              | linear    | 29.54****         | -                 | 0.00              | 1.39              | -                 | 6.73              |
|                                                                               | quadratic | 36.64****         | 8.04**            | 2.46              | 0.81              | 3.42 <sup>a</sup> | 0.00              |
| Total root biomass (g)                                                        | linear    | 29.64****         | -                 | 0.01              | 3.16 <sup>a</sup> | -                 | 2.97              |
|                                                                               | quadratic | 25.71****         | 6.64**            | 0.81              | 1.50              | 0.85              | 0.00              |
| Fine root biomass (g)                                                         | linear    | 51.05****         | -                 | 0.06              | 0.53              | -                 | 0.00              |
|                                                                               | quadratic | 55.51****         | 5.94*             | 0.10              | 2.48              | 0.79              | 6.38              |
| <b>Root growth</b>                                                            |           |                   |                   |                   |                   |                   |                   |
| Total root length (m)                                                         | linear    | 33.39****         | -                 | 0.01              | 1.74              | -                 | 8.22              |
|                                                                               | quadratic | 43.53****         | 11.74***          | 1.07              | 1.77              | 1.22              | 0.00              |
| SRL (m g <sup>-1</sup> )                                                      | linear    | 19.59****         | -                 | 0.01              | 0.55              | -                 | 1.10              |
|                                                                               | quadratic | 14.83****         | 9.19**            | 0.47              | 0.41              | 0.10              | 0.00              |
| <b>Leaf growth</b>                                                            |           |                   |                   |                   |                   |                   |                   |
| Total leaf area (cm <sup>2</sup> )                                            | linear    | 11.83***          | -                 | 1.05              | 0.28              | -                 | 1.43              |
|                                                                               | quadratic | 16.58****         | 6.12*             | 1.07              | 0.45              | 0.22              | 0.00              |
| SLA (cm <sup>2</sup> g <sup>-1</sup> )                                        | linear    | 33.05****         | -                 | 0.79              | 0.10              | -                 | 9.23              |
|                                                                               | quadratic | 42.93****         | 11.02***          | 0.51              | 0.29              | 2.17              | 0.00              |
| Leaf production (#)                                                           | linear    | 1.15              | -                 | 0.91              | 1.70              | -                 | 0.00              |
|                                                                               | quadratic | 0.20              | 0.98              | 3.74 <sup>a</sup> | 0.26              | 2.89 <sup>a</sup> | 1.50              |
| Growth rate (Δleaf #/day)                                                     | linear    | 2.99 <sup>a</sup> | -                 | 1.16              | 1.34              | -                 | 0.00              |
|                                                                               | quadratic | 1.40              | 0.48              | 4.20*             | 0.14              | 3.08 <sup>a</sup> | 1.72              |
| Growth rate (Δleaf length/day)                                                | linear    | 31.95****         | -                 | 0.06              | 2.70 <sup>a</sup> | -                 | 1.69              |
|                                                                               | quadratic | 35.37****         | 4.55*             | 1.73              | 1.92              | 1.89              | 0.00              |
| <b>Leaf stoichiometry</b>                                                     |           |                   |                   |                   |                   |                   |                   |
| Leaf N content (mg cm <sup>-2</sup> )                                         | linear    | 0.01              | -                 | 3.93*             | 0.03              | -                 | 0.00              |
|                                                                               | quadratic | 0.17              | 0.23              | 0.00              | 0.43              | 1.76              | 3.00              |
| Leaf P content (mg cm <sup>-2</sup> )                                         | linear    | 0.87              | -                 | 0.02              | 0.24              | -                 | 0.00              |
|                                                                               | quadratic | 0.82              | 0.37              | 0.57              | 0.04              | 1                 | 3.68              |
| N:P (mg mg <sup>-1</sup> )                                                    | linear    | 5.47*             | -                 | 4.80*             | 0.97              | -                 | 0.00              |
|                                                                               | quadratic | 8.38**            | 3.32 <sup>a</sup> | 0.8               | 1.65              | 0.18              | 1.54              |
| C:N (mg mg <sup>-1</sup> )                                                    | linear    | 29.96****         | -                 | 0.45              | 0.35              | -                 | 6.79              |
|                                                                               | quadratic | 33.42****         | 9.36**            | 0.47              | 1.20              | 2.24              | 0.00              |
| <b>Leaf gas exchange</b>                                                      |           |                   |                   |                   |                   |                   |                   |
| Photosynthetic rate (A, μmol m <sup>-2</sup> s <sup>-1</sup> )                | linear    | 40.90****         | -                 | 0.23              | 6.48**            | -                 | 1.24              |
|                                                                               | quadratic | 46.91****         | 6.04*             | 0.10              | 3.70 <sup>a</sup> | 0.58              | 0.00              |
| Stomatal conductance (g <sub>s</sub> , mmol m <sup>-2</sup> s <sup>-1</sup> ) | linear    | 47.00****         | -                 | 0.00              | 0.26              | -                 | 15.39             |
|                                                                               | quadratic | 63.24****         | 19.77****         | 0.16              | 0.00              | 0.41              | 0.00              |
| Water-use efficiency (A/E)                                                    | linear    | 54.22****         | -                 | 0.08              | 0.37              | -                 | 44.96             |
|                                                                               | quadratic | 102.23****        | 47.34****         | 0.67              | 0.79              | 0.84              | 0.00              |
| <b>Fungal growth</b>                                                          |           |                   |                   |                   |                   |                   |                   |
| Mycorrhizal colonization rate (%)                                             | linear    | 0.01              | -                 | 75.67****         | 0.04              | -                 | 6.44              |
|                                                                               | quadratic | 0.00              | 0.08              | 9.56**            | 0.01              | 0.40              | 0.00              |
| Mycorrhizal root length (m)                                                   | linear    | 0.88              | -                 | 62.30****         | 0.73              | -                 | 0.00              |
|                                                                               | quadratic | 0.75              | 0.00              | 14.27***          | 0.30              | 0.37              | 42.80             |

\*Asterisks indicate the level of significance (\**P* ≥ 0.05, \*\**P* ≥ 0.01, \*\*\**P* ≥ 0.001, \*\*\*\**P* ≥ 0.0001)<sup>a</sup>Response shows a marginal trend (0.1 > *P* > 0.05)

**Table 3.** Comparison of structural equation models for *T. ceratophorum* and *T. officinale*

| Model*                                                                                                                                               | <i>T. ceratophorum</i> |       |               | <i>T. officinale</i> |       |               |
|------------------------------------------------------------------------------------------------------------------------------------------------------|------------------------|-------|---------------|----------------------|-------|---------------|
|                                                                                                                                                      | Fisher's C             | P     | $\Delta$ AICc | Fisher's C           | P     | $\Delta$ AICc |
| <b>(1) [CO<sub>2</sub>] affected plant traits and <math>R_{\text{Bio}}</math> via changes in fungal growth (no direct [CO<sub>2</sub>] pathways)</b> |                        |       |               |                      |       |               |
| 1.1                                                                                                                                                  | 160.03                 | 0.003 | 81.77         | 165.38               | 0.001 | 83.53         |
| 1.2                                                                                                                                                  | 85.64                  | 0.85  | 22.66         | 94.34                | 0.69  | 16.00         |
| 1.3                                                                                                                                                  | 99.45                  | 0.93  | 32.76         | 118.15               | 0.72  | 24.07         |
| <b>(2) [CO<sub>2</sub>] directly affected plant traits and <math>R_{\text{Bio}}</math> (no fungal pathways)</b>                                      |                        |       |               |                      |       |               |
| 2.1                                                                                                                                                  | 172.77                 | 0.001 | 93.27         | 182.56               | 0.00  | 93.83         |
| 2.2                                                                                                                                                  | 109.37                 | 0.39  | 41.65         | 109.4                | 0.34  | 25.85         |
| 2.3                                                                                                                                                  | 125.74                 | 0.54  | 52.85         | 120.29               | 0.76  | 23.48         |
| <b>(3) [CO<sub>2</sub>] and fungal growth affected plant traits and <math>R_{\text{Bio}}</math></b>                                                  |                        |       |               |                      |       |               |
| 3.1                                                                                                                                                  | 123.77                 | 0.02  | 50.45         | 144.5                | 0.00  | 68.39         |
| 3.2                                                                                                                                                  | 62.13                  | 0.91  | 1.44          | 75.05                | 0.69  | 0.73          |
| 3.3                                                                                                                                                  | 77.15                  | 0.99  | 0.00          | 87.03                | 0.97  | 0.00          |

\*Models 1.3, 2.3, and 3.3 represented the simplest version of each model category that was not missing significant pathways based on Shipley's test of direction separation.

**Table 4.** Standardized pathway coefficients and submodel  $R^2$  values for the *T. ceratophorum* and *T. officinale* models with the lowest AICc values.

| Response ratios               | [CO <sub>2</sub> ] | Myc. length        | SRL       | Root length        | N:P               | C:N      | A        | $g_s$ | WUE  | SLA       | GR#               | GR <sub>length</sub> | Leaf area | $R^2$ |
|-------------------------------|--------------------|--------------------|-----------|--------------------|-------------------|----------|----------|-------|------|-----------|-------------------|----------------------|-----------|-------|
| <b><i>T. ceratophorum</i></b> |                    |                    |           |                    |                   |          |          |       |      |           |                   |                      |           |       |
| Mycorrhizal root length       | 0.43**             | -                  | -         | -                  | -                 | -        | -        | -     | -    | -         | -                 | -                    | -         | 0.19  |
| Specific root length (SRL)    | 0.50**             | -0.32 <sup>a</sup> | -         | -                  | -                 | -        | -        | -     | -    | -         | -                 | -                    | -         | 0.21  |
| Total root length             | -0.12              | -                  | -0.81**** | -                  | -                 | -        | -        | -     | -    | -         | -                 | -                    | -         | 0.75  |
| Leaf N:P                      | -                  | 0.59**             | -         | 0.38 <sup>a</sup>  | -                 | -        | -        | -     | -    | -         | -                 | -                    | -         | 0.31  |
| Leaf C:N                      | -0.60 <sup>a</sup> | -                  | -         | -0.47 <sup>a</sup> | -                 | -        | -        | -     | -    | -         | -                 | -                    | -         | 0.20  |
| Photosynthetic rate (A)       | -0.08              | -                  | -         | 0.42a              | -                 | -        | -        | -     | -    | -         | -                 | -                    | -         | 0.18  |
| Transpiration rate (E)        | -0.36 <sup>a</sup> | -                  | -         | -0.21              | -                 | -        | -        | -     | -    | -         | -                 | -                    | -         | 0.23  |
| Water-use efficiency (WUE)    | 0.14               | -0.64**            | -         | -                  | 0.36 <sup>a</sup> | -        | -        | -     | -    | -         | -                 | -                    | -         | 0.29  |
| Specific leaf area (SLA)      | -                  | -                  | -         | 0.34*              | -                 | -        | -        | -     | -    | -         | -                 | -                    | -         | 0.11  |
| Growth rate (#/day)           | -                  | -                  | -         | 0.59**             | -0.41*            | -        | -        | -     | -    | -         | -                 | -                    | -         | 0.35  |
| Growth rate (length/day)      | -                  | -0.22 <sup>a</sup> | -         | 0.54***            | -                 | -        | -        | -     | -    | 0.20      | -                 | -                    | -         | 0.45  |
| Total leaf area               | -                  | -0.14 <sup>a</sup> | -         | 0.21*              | -                 | -        | -        | -     | -    | -         | 0.37***           | 0.46***              | -         | 0.86  |
| Total biomass ( $R_{Bio}$ )   | -                  | -                  | 0.15*     | 0.50****           | -                 | -        | -        | -     | -    | -0.12**   | 0.09 <sup>a</sup> | -                    | 0.69****  | 0.97  |
| <b><i>T. officinale</i></b>   |                    |                    |           |                    |                   |          |          |       |      |           |                   |                      |           |       |
| Mycorrhizal root length       | 0.28               | -                  | -         | -                  | -                 | -        | -        | -     | -    | -         | -                 | -                    | -         | 0.08  |
| Specific root length (SRL)    | -0.38*             | -                  | -         | -                  | -                 | -        | -        | -     | -    | -         | -                 | -                    | -         | 0.15  |
| Total root length             | 0.20*              | -                  | -0.82**** | -                  | -                 | -        | -        | -     | -    | -         | -                 | -                    | -         | 0.83  |
| Leaf N:P                      | -                  | 0.42****           | -         | -0.77****          | -                 | -        | -        | -     | -    | -         | -                 | -                    | -         | 0.58  |
| Leaf C:N                      | -0.14              | -                  | -         | 0.89****           | -                 | -        | -        | -     | -    | -         | -                 | -                    | -         | 0.64  |
| Photosynthetic rate (A)       | -0.17              | -                  | -         | -0.66***           | -                 | -        | -        | -     | -    | -         | -                 | -                    | -         | 0.58  |
| Transpiration rate (E)        | 0.10               | 0.44*              | -         | -0.52*             | -                 | -        | -        | -     | -    | -         | -                 | -                    | -         | 0.31  |
| Water-use efficiency (WUE)    | -                  | -0.36**            | -0.51***  | -                  | -                 | -        | -        | -     | -    | -         | -                 | -                    | -         | 0.54  |
| Specific leaf area (SLA)      | -                  | -                  | -         | -                  | -                 | -0.61*** | -        | -     | -    | -         | -                 | -                    | -         | 0.52  |
| Growth rate (#/day)           | -                  | -                  | -         | -                  | -                 | -        | -        | -     | -    | -0.47**   | -                 | -                    | -         | 0.22  |
| Growth rate (length/day)      | -                  | -                  | -         | 0.89****           | -                 | -0.37*   | -0.41*** | -     | 0.20 | -         | -                 | -                    | -         | 0.84  |
| Total leaf area               | -                  | -                  | -         | 0.75****           | -                 | -        | -0.38**  | -     | -    | 0.72****  | 0.13              | -                    | -         | 0.85  |
| Total biomass ( $R_{Bio}$ )   | -                  | -                  | -         | 0.17               | -                 | 0.20*    | -        | -     | -    | -0.49**** | -                 | -                    | 0.55****  | 0.97  |

\*Asterisks indicate the level of significance (\* $P \geq 0.05$ , \*\* $P \geq 0.01$ , \*\*\* $P \geq 0.001$ , \*\*\*\* $P \geq 0.0001$ )

<sup>a</sup>Response shows a marginal trend ( $0.1 > P > 0.05$ )
